# Supplementary material for: Controlled Production of Zearalenone-Glucopyranoside Standards with Cunninghamella Strains Using Sulphate-Depleted Media
Source: MDPI journal article supplement (doi:10.3390/toxins13060366), 2021-05-21
Supplement: s1 [file s1]

# Supplementary Materials: Controlled Production of Zearalenone-Glucopyranoside Standards with *Cunninghamella* Strains Using Sulphate-Depleted Media

Jeroen Peters, Edward Ash, Arjen Gerssen, Ruud Van Dam, Maurice C. R. Franssen and Michel W. F. Nielen

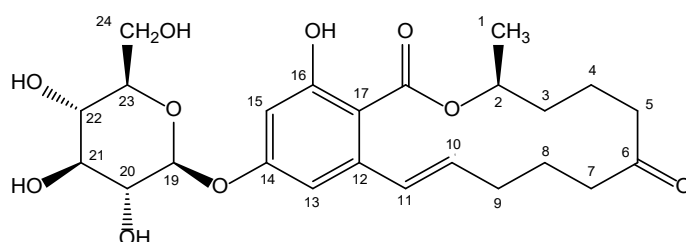

Figure S1. Numbering of atoms for ZEN and its glucosides.

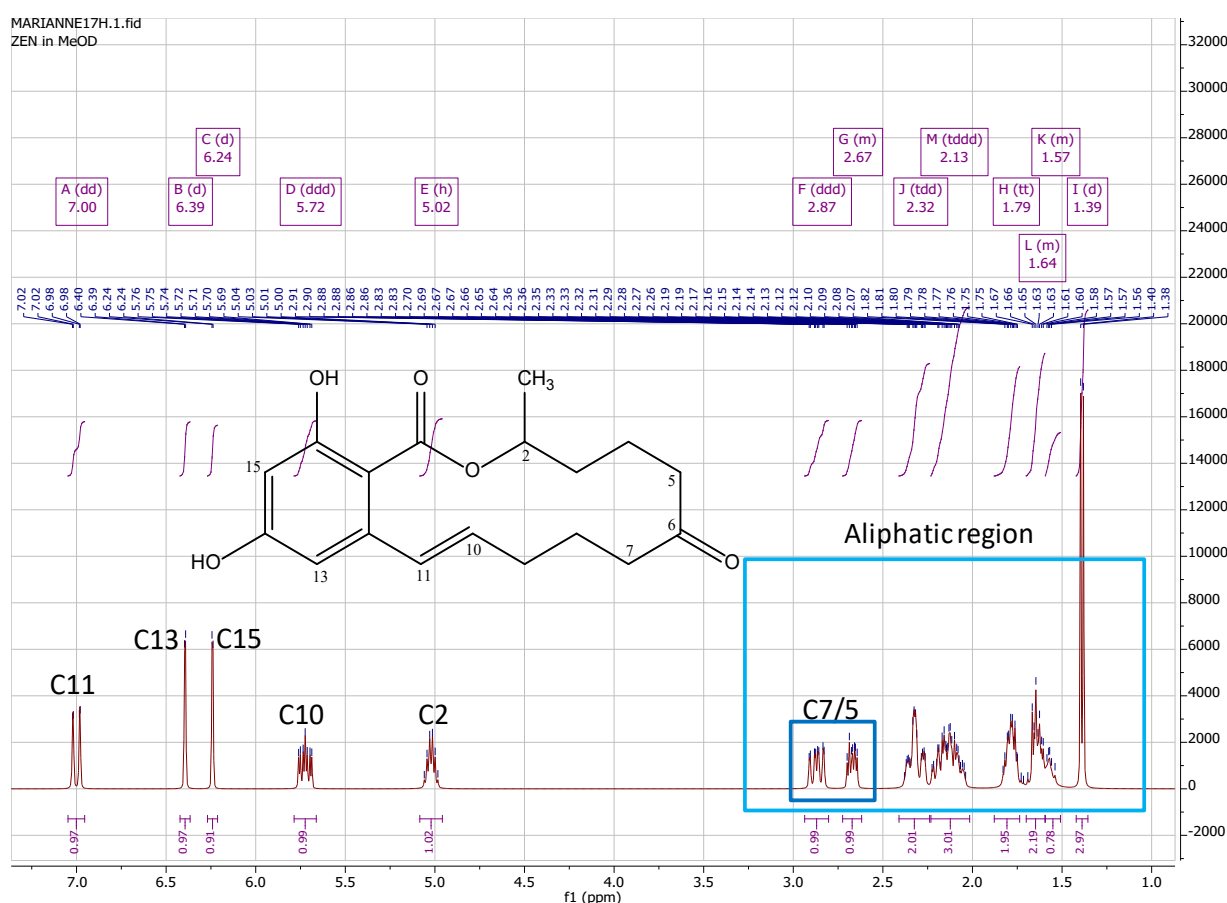

Figure S2. <sup>1</sup>H-NMR spectrum of ZEN.

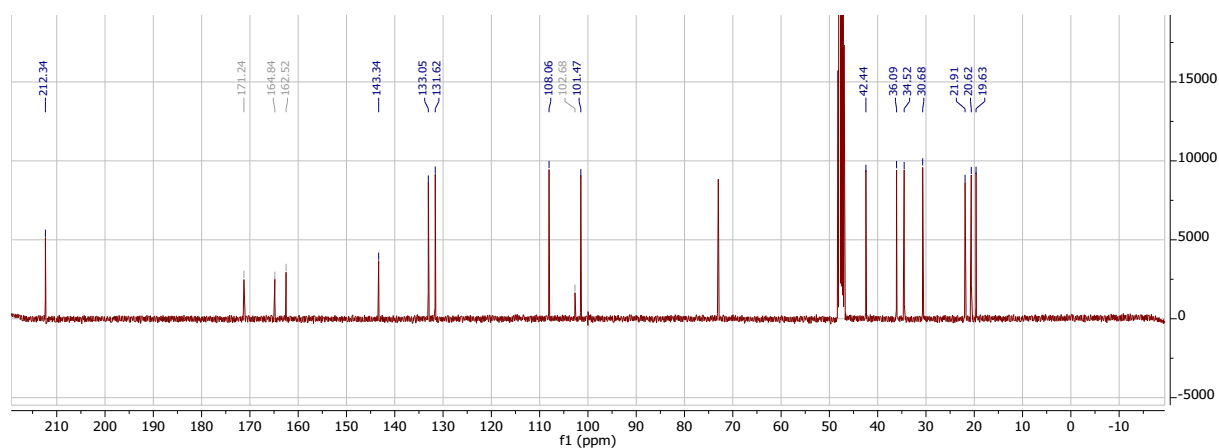Figure S3.  $^{13}\text{C}$ -NMR spectrum of ZEN.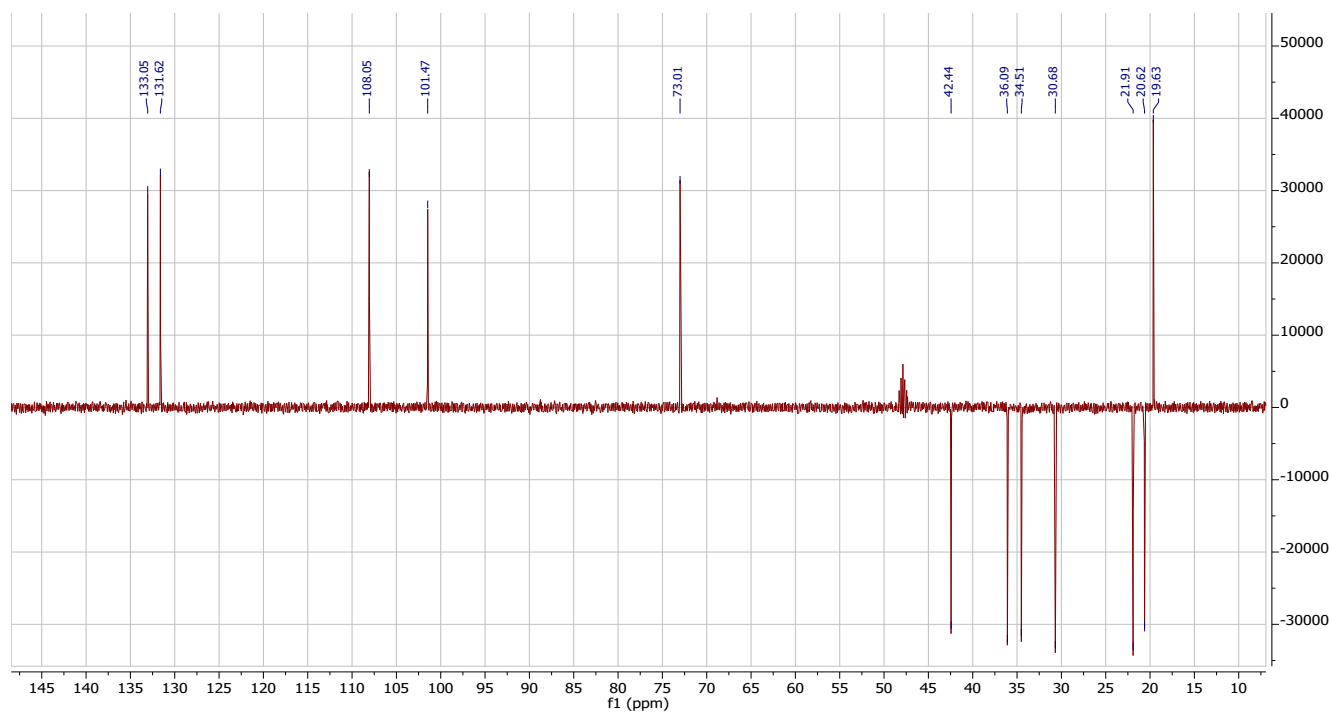

Figure S4. DEPT spectrum of ZEN.

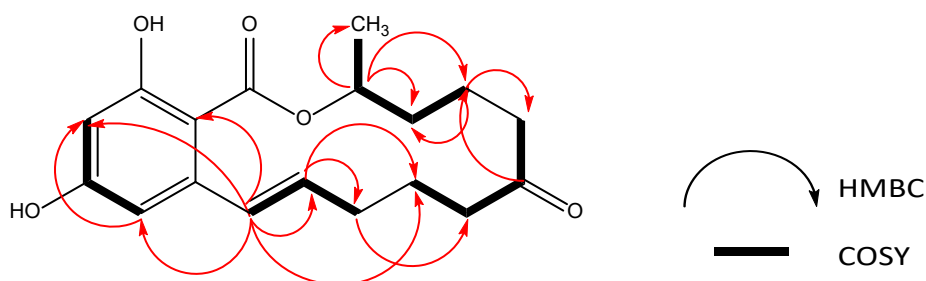

Figure S5. The most important 2D-coupling signals in ZEN.

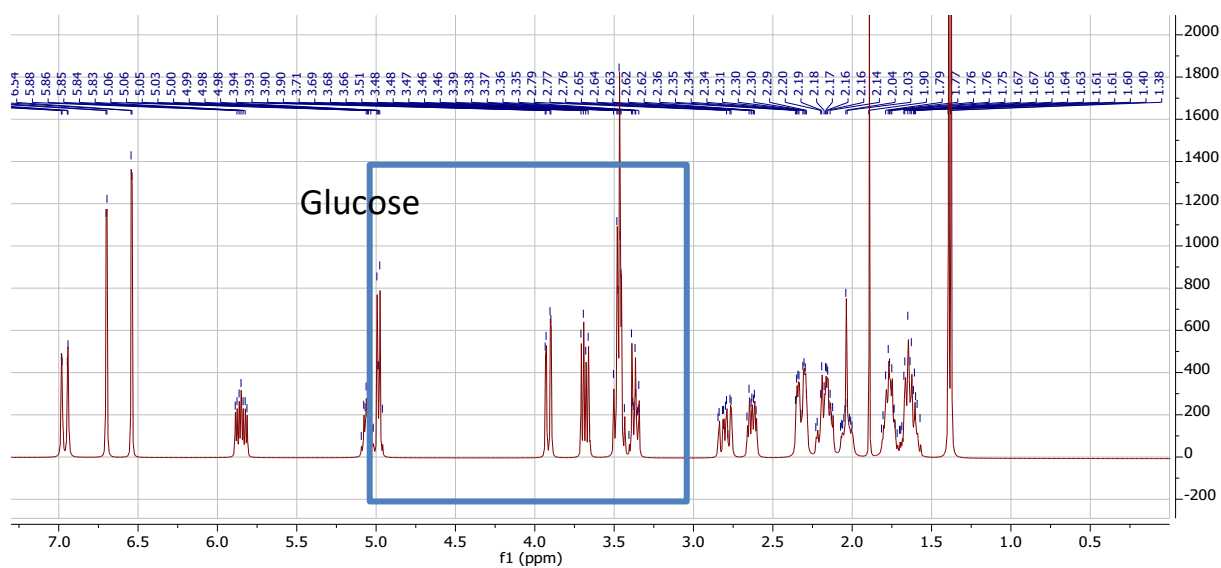Figure S6.  $^1\text{H}$ -NMR spectrum of Z14G.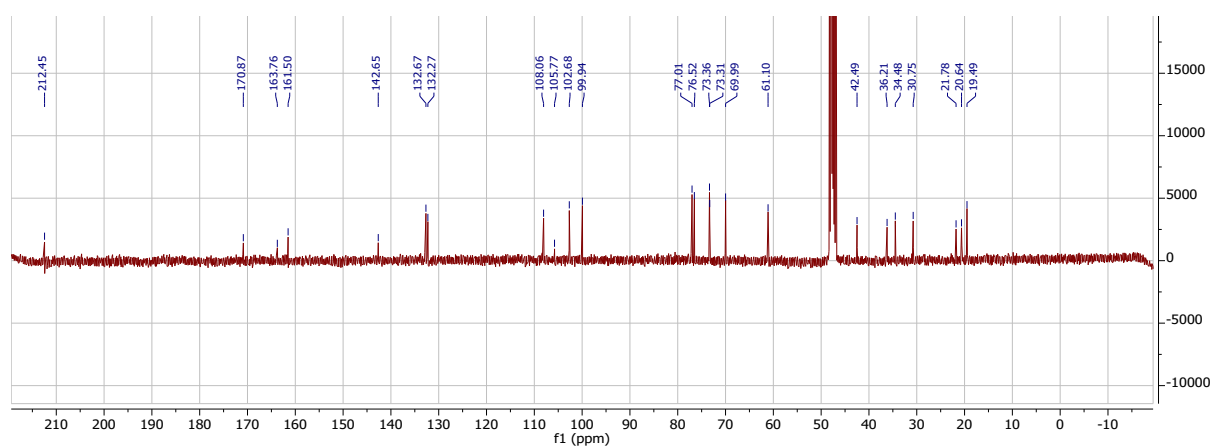Figure S7.  $^{13}\text{C}$ -NMR spectrum of Z14G.

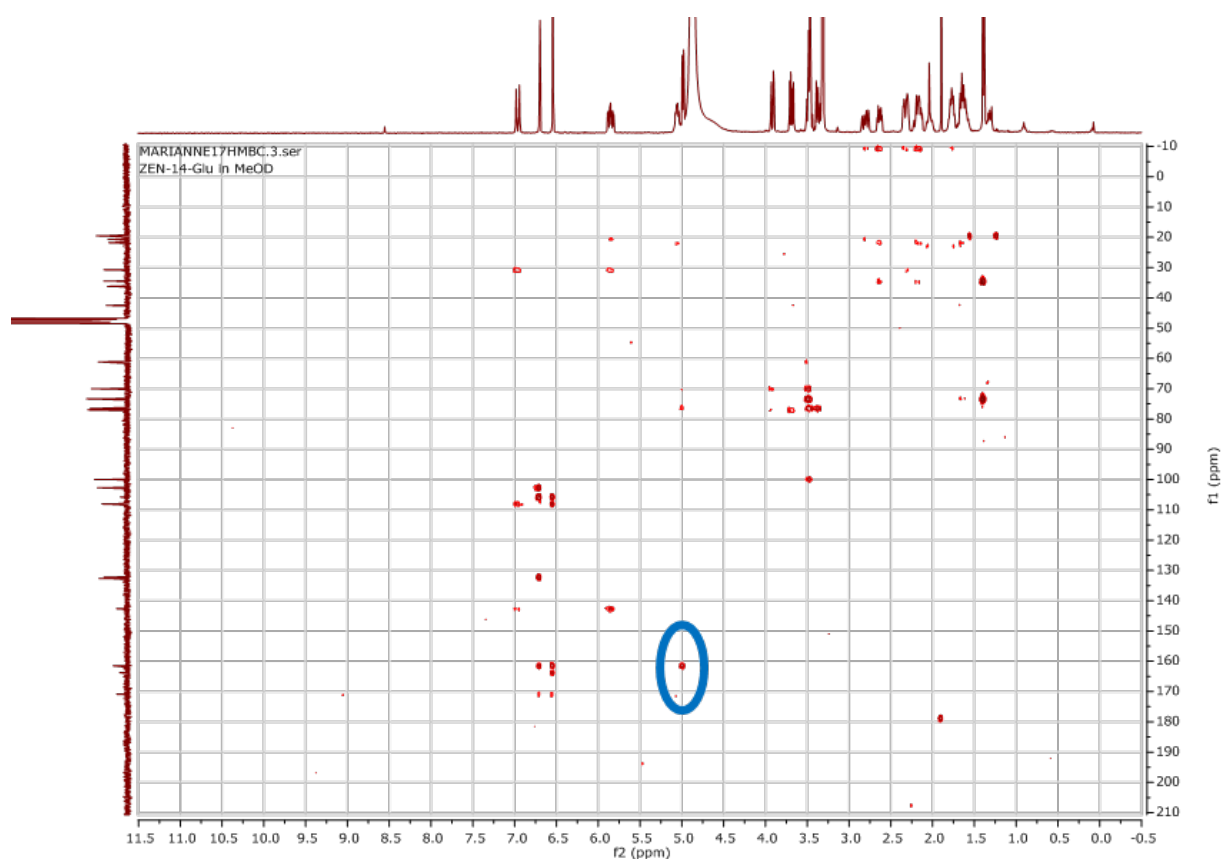

Figure S8. Key HMBC coupling between C14 and C19 in Z14G.

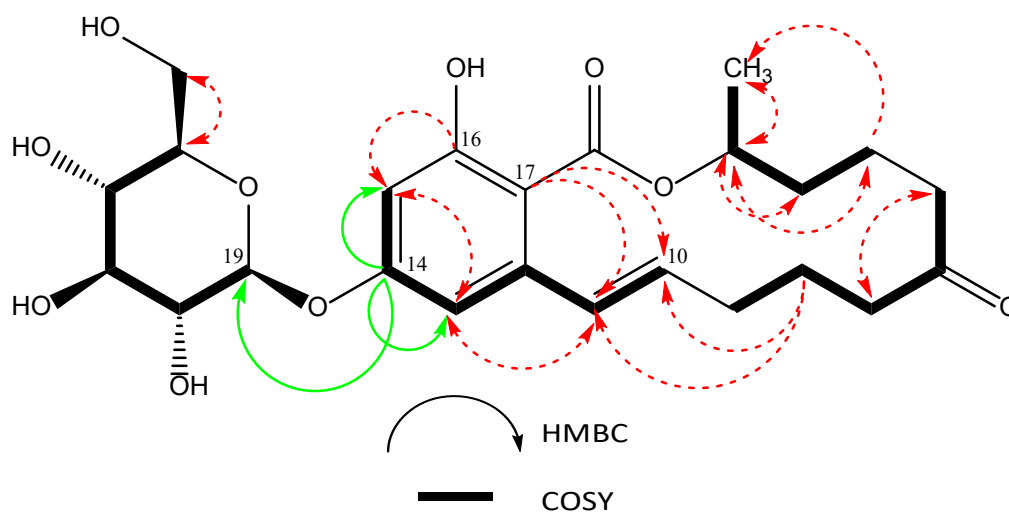

Figure S9. Key HMBC and COSY interactions in Z14G; the green arrows are the couplings that confirm the compound as the C14 conjugate.

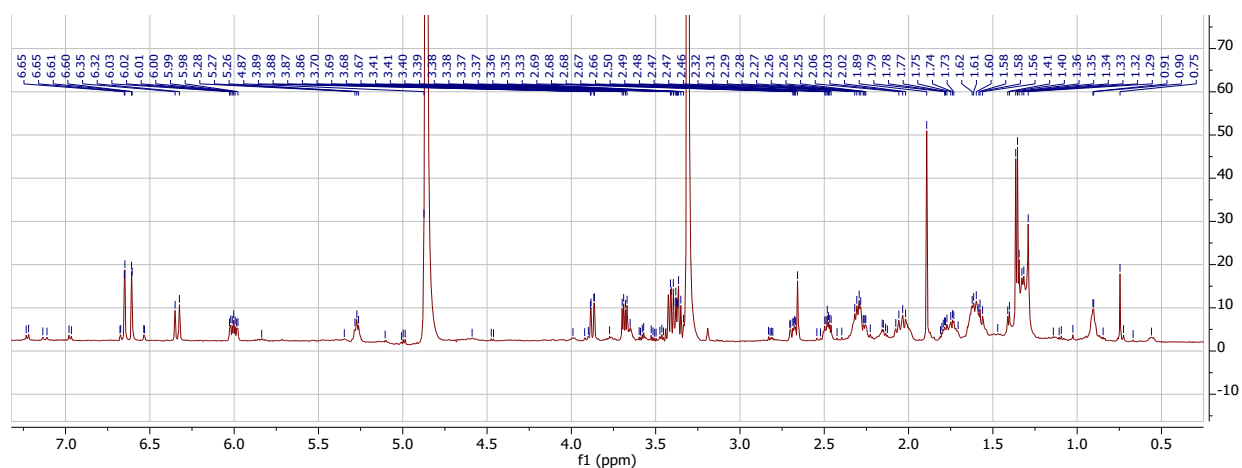

Figure S10. <sup>1</sup>H-NMR spectrum of Z16G.

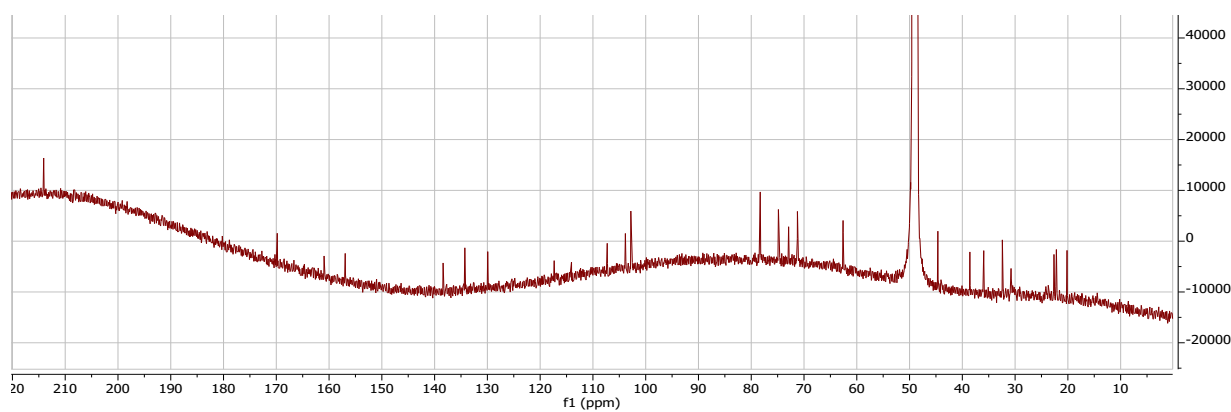

Figure S11. <sup>13</sup>C NMR spectrum for Z16G; wavy baseline due to low concentration.

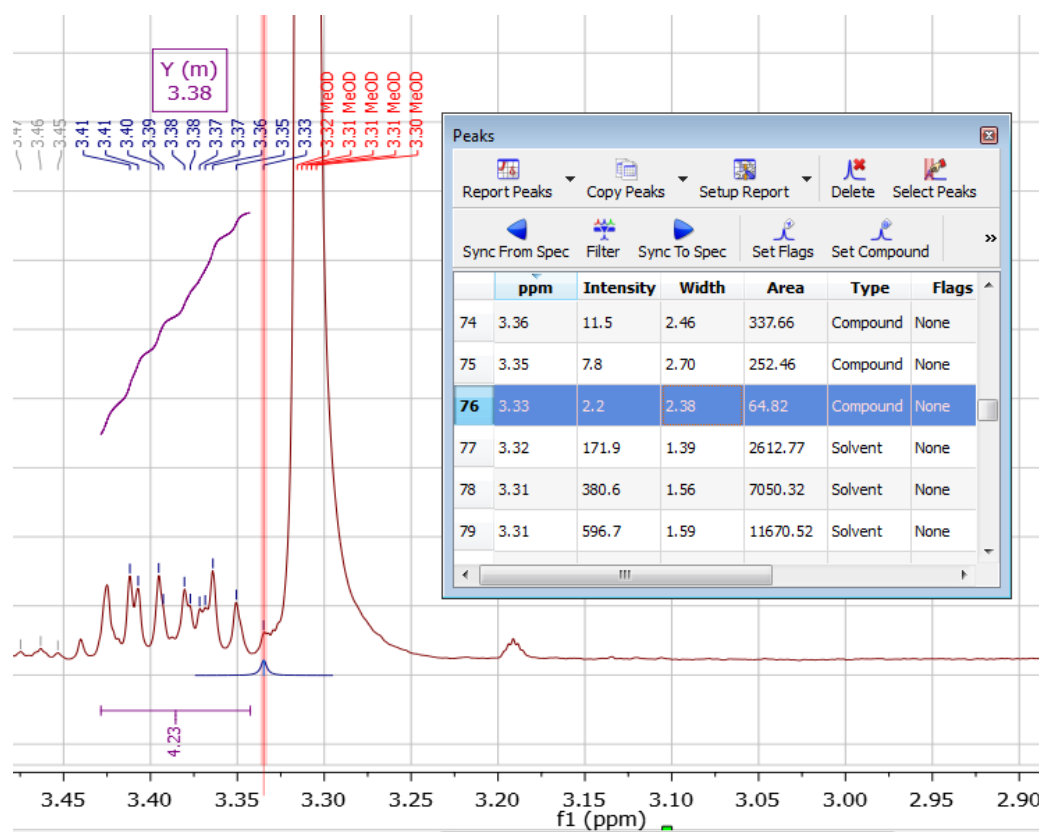

**Figure S12.** Z16G  $^1\text{H}$  NMR, showing the shoulder on the MeOD peak indicating the proton on the anomeric C19 which couples to C16—see HMBC in Figure S9.

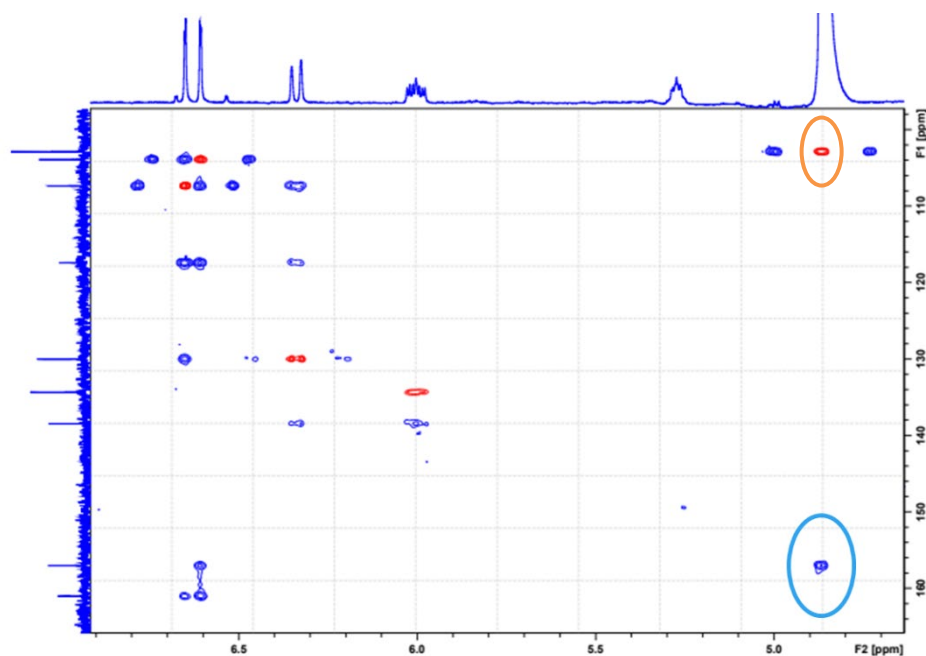

**Figure S13.** Key HMBC coupling between C16 and C19 in Z16G circled in blue; red couplings are HSQC, blue is HMBC. Circled in green is the HSQC coupling between C19 and its  $\alpha$ -hydrogen.

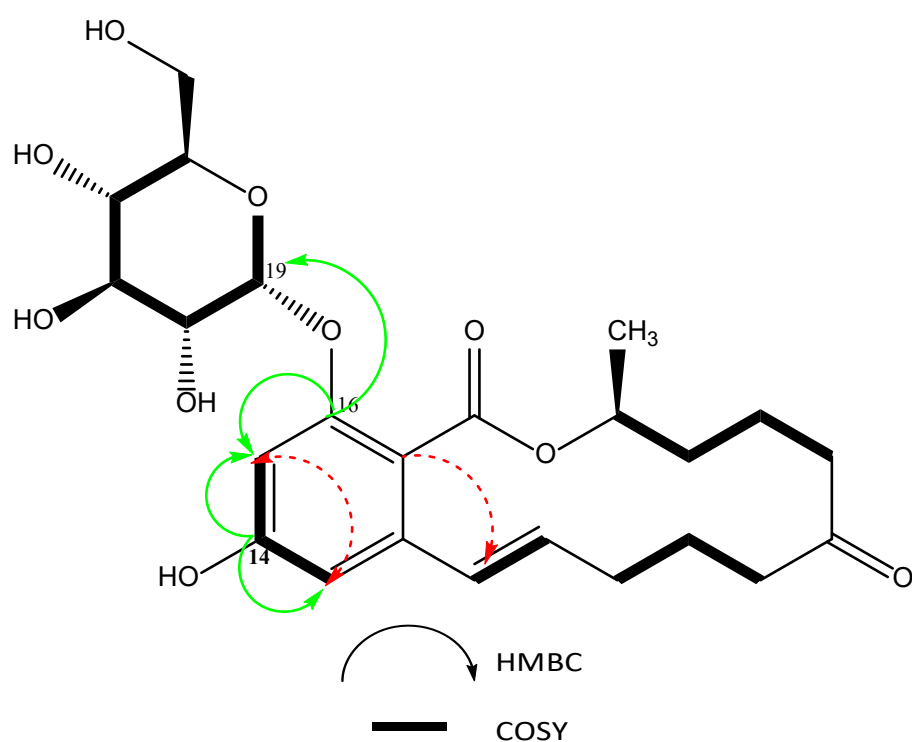

**Figure S14.** Key HMBC and COSY interactions in Z16G; the green arrows are the couplings that confirm the compound as the C16 conjugate.

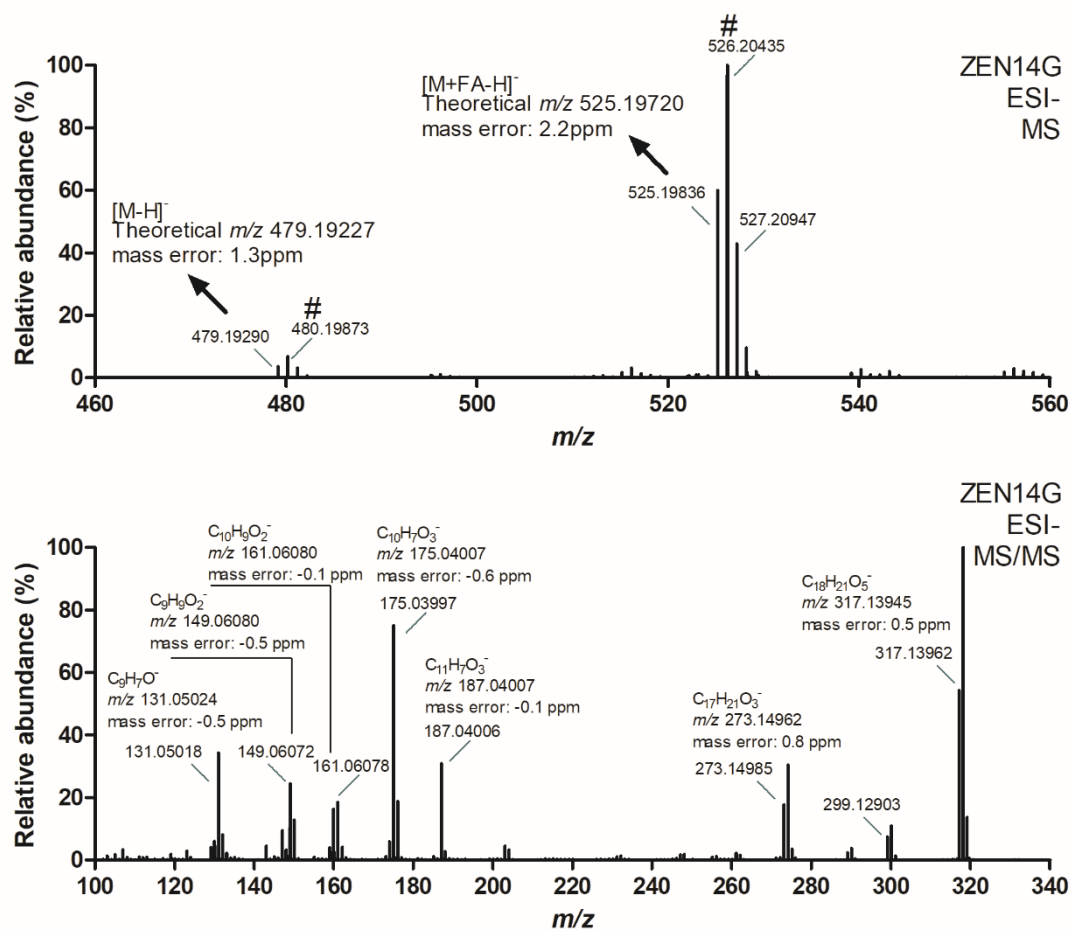

**Figure S15.** High resolution mass spectra and fragmentation spectra of Z14G (# obtained radical anion).



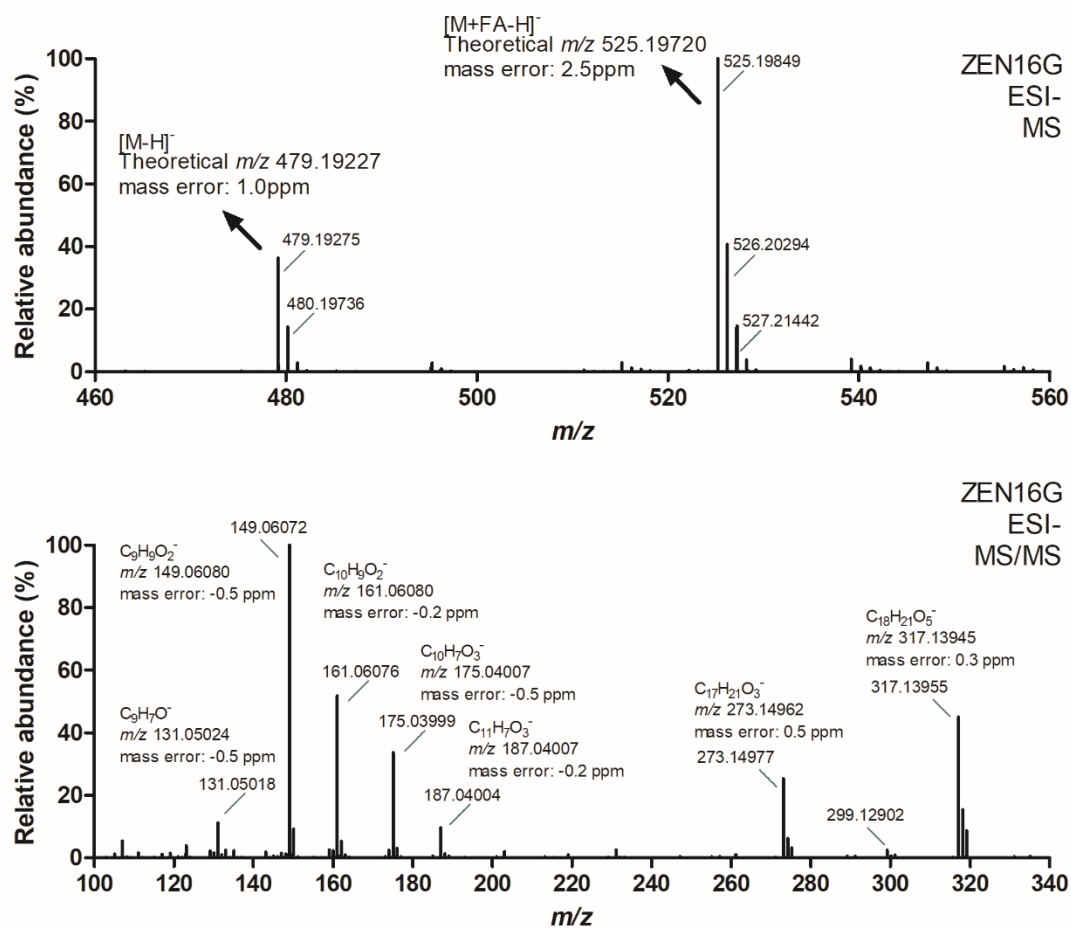

Figure S16. High resolution mass spectra and fragmentation spectra of Z16G.

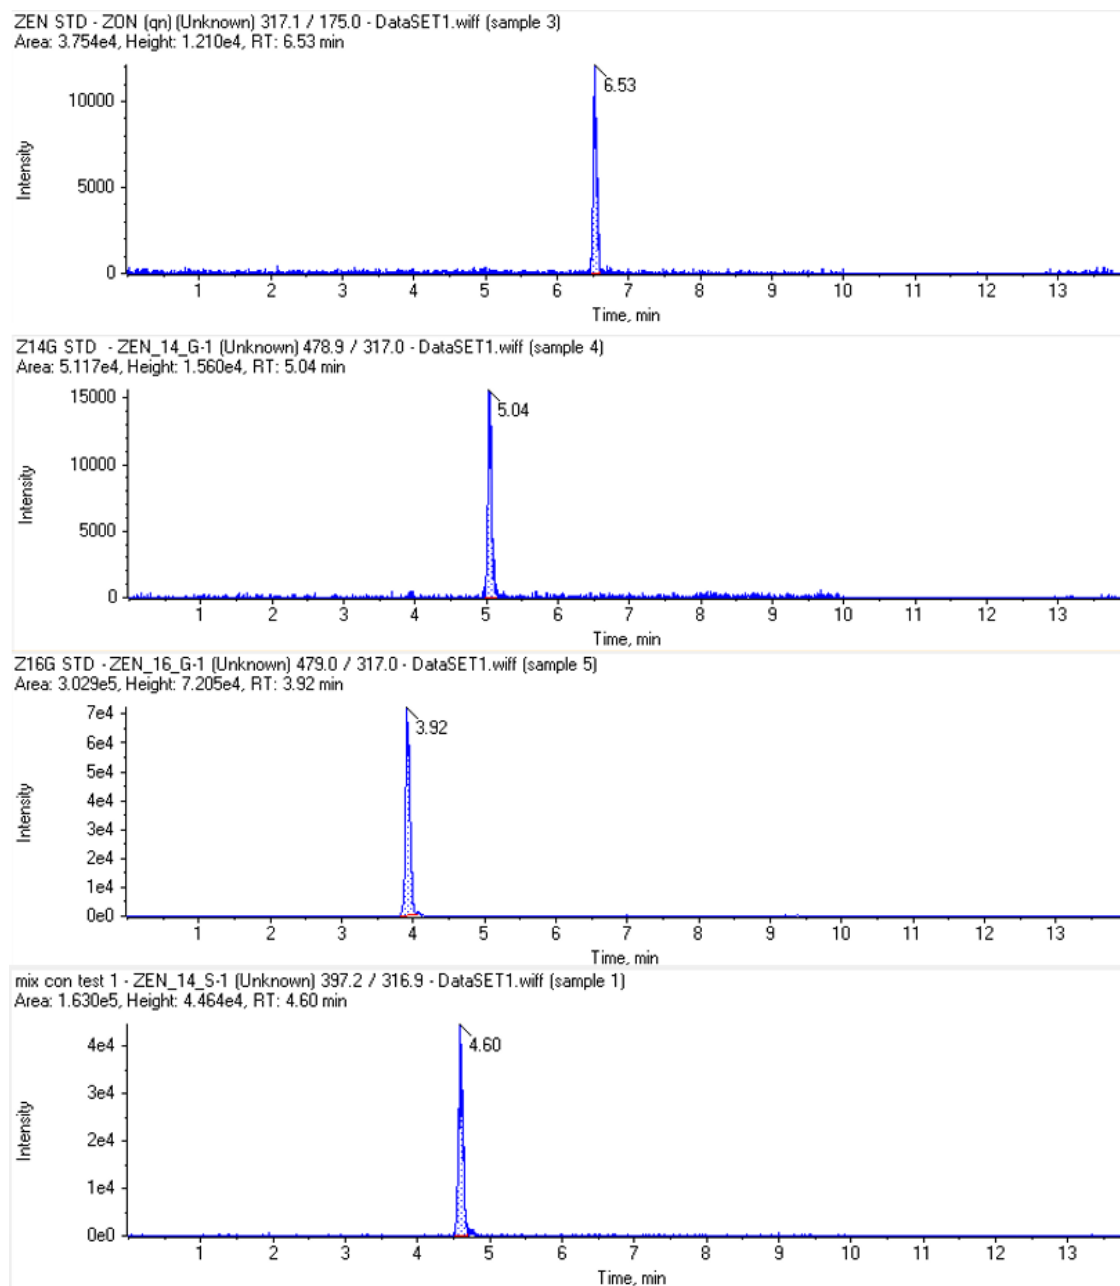

**Figure S17.** Applied ZEN reference standards in the developed LC-MS/MS method, with (A) ZEN, (B) Z14G, (C) Z16G and (D) Z14S.

Table S1. <sup>1</sup>H NMR data of ZEN.

| <sup>1</sup> H Peak | ppm  | Integral | Class | J1   | J2   | J3  | J4  | COSY<br>( <sup>1</sup> H peak #) | HSQC<br>( <sup>13</sup> C peak #) | Carbon type      | Identity |
|---------------------|------|----------|-------|------|------|-----|-----|----------------------------------|-----------------------------------|------------------|----------|
| 1                   | 6.99 | 1        | dd    | 15.3 | 1.9  |     |     | 2, 3, 4                          | 6                                 | alkene           | C11      |
| 2                   | 6.38 | 1        | d     | 2.4  |      |     |     | 1, 3                             | 8                                 | benzene          | C13      |
| 3                   | 6.22 | 1        | d     | 2.5  |      |     |     | 1, 2                             | 10                                | benzene          | C15      |
| 4                   | 5.71 | 1        | ddd   | 14.8 | 10.2 | 4.0 |     | 1, 9                             | 7                                 | alkene           | C10      |
| 5                   | 5.01 | 1        | h     | 6.1  |      |     |     | 11, 13                           | 11                                | ester            | C2       |
| 6                   | 2.85 | 1        | ddd   | 18.9 | 11.9 | 2.6 |     | 7, 8, 9                          | 13                                | ketone neighbour | C5       |
| 7                   | 2.66 | 1        | m     |      |      |     |     | 6, 8, 9                          | 12                                | ketone neighbour | C7       |
| 8                   | 2.3  | 2        | tdd   | 18.7 | 5.3  | 2.3 |     | 6, 7, 9, 11                      | 13, 15                            | aliphatic        | C5/C8    |
| 9                   | 2.12 | 3        | tddd  | 19.9 | 14.6 | 8.7 | 3.3 | 6, 7, 8, 10, 11                  | 12, 15                            | aliphatic        | C7/C8/9  |
| 10                  | 1.77 | 2        | tt    | 11.3 | 5.5  |     |     | 7, 9, 11, 13                     | 14, 16                            | aliphatic        | C3/4     |
| 11                  | 1.64 | 2        | m     |      |      |     |     | 10, 13                           | 14, 16                            | aliphatic        | C3/4     |
| 12                  | 1.55 | 1        | m     |      |      |     |     | 8, 9                             | 17                                | aliphatic        | C9       |
| 13                  | 1.37 | 3        | d     | 6.1  |      |     |     | 10, 11                           | 18                                | CH3              | C1       |

Table S2. <sup>13</sup>C NMR data of ZEN.

| <sup>13</sup> C Peak | ppm    | DEPT<br>(#αH) | HSQC<br>(α H peak) (#αH) | HMBC<br>(β/γ H peak) | Carbon<br>Identity |
|----------------------|--------|---------------|--------------------------|----------------------|--------------------|
| 1                    | 212.34 | 0             |                          |                      | C6                 |
| 2                    | 171.24 | 0             |                          | 2, 3, 5              | C18                |
| 3                    | 164.84 | 0             |                          | 3                    | C16                |
| 4                    | 162.52 | 0             |                          | 2, 3                 | C14                |
| 5                    | 143.34 | 0             |                          | 1, 4                 | C17                |
| 6                    | 133.05 | 1             | 1                        | 2, 4, 9?             | C11                |
| 7                    | 131.62 | 1             | 4                        | 9                    | C10                |
| 8                    | 108.06 | 1             | 2                        | 1, 3                 | C13                |
| 9                    | 102.68 | 0             |                          | 2, 3                 | C12                |
| 10                   | 101.47 | 1             | 3                        | 2                    | C15                |
| 11                   | 73.01  | 1             | 5                        | 10, 11, 13           | C2                 |
| 12                   | 42.44  | 2             | 7, 9                     | 1+3                  | C7                 |
| 13                   | 36.09  | 2             | 8, 6                     | 2+1                  | C5                 |
| 14                   | 34.52  | 2             | 10, 11                   | 2+2                  | C3/4               |
| 15                   | 30.68  | 2             | 8, 9                     | 2+3                  | C8                 |
| 16                   | 21.91  | 2             | 10, 11                   | 2+2                  | C3/4               |
| 17                   | 20.62  | 2             | 9, 12                    | 3+1                  | C9                 |
| 18                   | 19.63  | 3             | 13                       | 3                    | C1                 |

Table S3. <sup>1</sup>H-NMR data of Z14G.

| Peak | ppm  | Integral | Class | J1   | J2   | J3  | COSY<br>( <sup>1</sup> H peak #) | HSQC<br>( <sup>13</sup> C peak #) | Carbon type             | Identity         |
|------|------|----------|-------|------|------|-----|----------------------------------|-----------------------------------|-------------------------|------------------|
| 1    | 6.96 | 1        | dd    | 15   | 1.7  |     | 2, 3, 4                          | 7                                 | alkene                  | C11              |
| 2    | 6.74 | 1        | d     | 2.5  |      |     | 1, 3, 4                          | 8                                 | benzene                 | C13              |
| 3    | 6.54 | 1        | d     | 2.5  |      |     | 1, 2                             | 10                                | benzene                 | C15              |
| 4    | 5.85 | 1        | ddd   | 15   | 9.8  | 4.5 | 1, 2, 13, 14                     | 6                                 | alkene                  | C10              |
| 5    | 5.06 | 1        | m     |      |      |     | 17, 18, 20                       | 15                                | CH1, ester              | C2               |
| 6    | 4.99 | 2        | m     |      |      |     | 9                                | 11                                | glucose &<br>OH?        | C19 & an<br>OH?  |
| 7    | 3.92 | 1        | dd    | 12.1 | 2.2  |     | 8, 9                             | 17                                | CH2 Glc                 | C24              |
| 8    | 3.69 | 1        | dd    | 12.1 | 6.1  |     | 7, 9, 10                         | 17                                | CH2 Glc                 | C24              |
| 9    | 3.47 | 3        | dd    |      |      |     | 6, 7, 8, 10                      | 12, 13, 14                        | glucose                 | C20 & 22<br>& 23 |
| 10   | 3.37 | 2        | m     |      |      |     | 8, 10                            | 16                                | glucose and<br>OH?      | C21 & an<br>OH?  |
| 11   | 2.81 | 1        | ddd   | 18.8 | 11.4 | 2.7 | 13, 15                           | 19                                | ketone                  | C7               |
| 12   | 2.63 | 1        | m     |      |      |     | 14, 17                           | 18                                | ketone                  | C5               |
| 13   | 2.32 | 2        | ddd   | 18.9 | 6.2  | 2.9 | 11, 18, 19                       | 19, 21                            | aliphatic and<br>ketone | C8 & 5           |
| 14   | 2.17 | 2        | m     |      |      |     | 13, 17, 18, 19                   | 18, 21                            | aliphatic and<br>ketone | C8 & 7           |
| 15   | 2.03 | 1        | m     |      |      |     | 11, 18, 19                       | 23                                | aliphatic               | C9               |
| 16   | 1.9  | 1        | s     |      |      |     | -                                | -                                 | OH?                     | OH?              |
| 17   | 1.77 | 2        | m     |      |      |     | 5, 12, 14, 18                    | 20, 22                            | aliphatic               | C3 & 4           |
| 18   | 1.65 | 2        | m     |      |      |     | 5, 13, 14, 15                    | 20                                | aliphatic               | C3 & 4           |
| 19   | 1.6  | 1        | m     |      |      |     | 13, 14, 15                       | 23                                | aliphatic               | C9               |
| 20   | 1.39 | 3        | d     | 6.2  |      |     | 5                                | 24                                | CH3                     | C1               |

Table S4. <sup>13</sup>C-NMR data of Z14G.

| Peak | ppm    | DEPT<br>(#αH) | HSQC<br>(α H peak) (#α H) |     | HMBC<br>(β/γ H peak) | Carbon Identity |
|------|--------|---------------|---------------------------|-----|----------------------|-----------------|
| 1    | 212.45 | 0             |                           |     |                      | C6              |
| 2    | 170.87 | 0             |                           |     | 2, 3                 | C18             |
| 3    | 163.76 | 0             |                           |     | 3                    | C16             |
| 4    | 161.5  | 0             |                           |     | 2, 3, 6              | C14             |
| 5    | 142.65 | 0             |                           |     | 4, 1                 | C17             |
| 6    | 132.67 | 1             | 4                         | 1   |                      | C10             |
| 7    | 132.27 | 1             | 1                         | 1   | 2                    | C11             |
| 8    | 108.06 | 1             | 2                         | 1   | 1, 3                 | C13             |
| 9    | 105.77 | 0             |                           |     | 2, 3                 | C12             |
| 10   | 102.68 | 1             | 3                         | 1   | 2                    | C15             |
| 11   | 99.94  | 1             | 6                         | 2   | 9                    | C19             |
| 12   | 77.01  | 1             | 9                         | 3   | 7, 8                 | C23             |
| 13   | 76.52  | 1             | 9                         | 3   | 6, 9, 10             | C20             |
| 14   | 73.36  | 1             | 9                         | 3   | 10                   | C22             |
| 15   | 73.31  | 1             | 5                         | 1   | 18, 20               | C2              |
| 16   | 69.99  | 1             | 10                        | 2   | 6, 7, 9              | C21             |
| 17   | 61.1   | 2             | 7, 8                      | 1+1 | 9                    | C24             |
| 18   | 42.49  | 2             | 12, 14                    | 1+2 | 17, 18               | C7              |
| 19   | 36.21  | 2             | 11, 13                    | 1+2 | 20                   | C5              |
| 20   | 34.48  | 2             | 18, 17                    | 2+2 | 12, 14, 20           | C3/4            |
| 21   | 30.75  | 2             | 13, 14                    | 2+2 | 1, 4, 13             | C8              |
| 22   | 21.78  | 2             | 17                        | 2   | 5, 12, 14, 18        | C3/4            |
| 23   | 20.64  | 2             | 15, 19                    | 1+1 | 5, 11                | C9              |
| 24   | 19.49  | 3             | 20                        | 3   | 19                   | C1              |

Table S5. <sup>1</sup>H-NMR data of Z16G.

| Peak | ppm  | Integral      | Class | J1   | J2   | J3   | COSY<br>( <sup>1</sup> H peak #) | HSQC<br>( <sup>13</sup> C peak #) | Carbon type | Identity     |
|------|------|---------------|-------|------|------|------|----------------------------------|-----------------------------------|-------------|--------------|
| 1    | 6.65 | 1             | d     | 2.1  |      |      | 2                                | 9                                 | benzene     | C13          |
| 2    | 6.61 | 1             | d     | 2.1  |      |      | 1                                | 10                                | benzene     | C15          |
| 3    | 6.34 | 1             | d     | 15.4 |      |      | 4, 12, 13, 16                    | 7                                 | alkene      | C11          |
| 4    | 6.00 | 1             | ddd   | 4.6  | 9.8  | 15.1 | 1, 2, 12, 13                     | 6                                 | alkene      | C10          |
| 5    | 5.27 | 2             | s     |      |      |      | 13, 16                           | 13                                | ester       | C2           |
| 6    | 4.87 | under solvent | n/a   |      |      |      | 9                                | 11                                | glucose     | C19          |
| 7    | 3.87 | 1             | dd    | 2.1  | 12.1 |      | 8, 9                             | 16                                | glucose     | C24          |
| 8    | 3.68 | 2             | dd    | 5.4  | 12.1 |      | 5, 9                             | 15, 16                            | glucose     | C24          |
| 9    | 3.38 | 4             | m     |      |      |      | 7, 9                             | 12, 13, 15                        | glucose     | C20/21/22/23 |
| 10   | 2.67 | 2             | m     |      |      |      | 12, 13, 16                       | 18                                | ketone      | C5           |
| 11   | 2.48 | 1             | td    | 4.6  | 9.0  |      | 12, 15, 16                       | 17                                | ketone      | C7           |
| 12   | 2.29 | 1             | m     |      |      |      | 10, 11, 13, 15, 16, 17           | 17, 18                            | aliphatic   | C5/7/9       |
| 13   | 2.05 | 2             | m     |      |      |      | 10, 12, 16                       | 20, 21                            | aliphatic   | C8/9         |
| 14   | 1.89 | 2             | s     |      |      |      |                                  |                                   | OH?         |              |
| 15   | 1.79 | 2             | m     |      |      |      | 11, 12, 16, 17                   | 19, 22                            | aliphatic   | C3/4         |
| 16   | 1.59 | 2             | m     |      |      |      | 11, 12, 15, 17                   | 19, 22                            | aliphatic   | C3/4         |
| 17   | 1.34 | 3             | m     |      |      |      | 12, 15, 16, 18                   | 23                                | aliphatic   | C1           |
| 18   | 0.91 | 3             | s     |      |      |      | 17                               |                                   | OH?         |              |

Table S6. <sup>13</sup>C-NMR data of Z16G.

| Peak | ppm   | HSQC<br>(α H peak) (#α H) | HMBC<br>(β/γ H peak) | Carbon<br>Identity |
|------|-------|---------------------------|----------------------|--------------------|
| 1    | 214.1 | 0                         | 11, 12               | C6                 |
| 2    | 169.8 | 0                         | 1, 2                 | C18                |
| 3    | 161.0 | 0                         | 1, 2                 | C14                |
| 4    | 156.9 | 0                         | 2, 6                 | C16                |
| 5    | 138.4 | 0                         | 4                    | C17                |
| 6    | 134.3 | 4                         | 1                    | C10 (alkene)       |
| 7    | 129.9 | 3                         | 1, 2                 | C11 (alkene)       |
| 8    | 117.3 |                           | 1, 2                 | C12                |
| 9    | 107.3 | 1                         | 2, 3                 | C13                |
| 10   | 103.9 | 2                         | 1                    | C15                |
| 11   | 102.8 | 6                         | 9                    | C19                |
| 12   | 78.3  | 9                         | 6, 7, 8, 9           | C20/23             |
| 13   | 74.8  | 9                         | 9, 17                | C21                |
| 14   | 72.0  | 5                         | 17                   | C2                 |
| 15   | 71.2  | 9                         | 9                    | C22                |
| 16   | 62.6  | 7, 8                      | 7, 8, 9              | C24                |
| 17   | 44.7  | 11, 12                    | 9?                   | C7                 |
| 18   | 38.6  | 10, 12                    | 17?                  | C5                 |
| 19   | 35.9  | 15, 16                    | 11, 17               | C3                 |
| 20   | 32.4  | 12, 13                    | 3, 4, 9, 15, 17      | C9                 |
| 21   | 22.7  | 13                        |                      | C8                 |
| 22   | 22.2  | 15, 16                    |                      | C4                 |
| 23   | 20.2  | 17                        |                      | C1                 |

**Table S7.** Calculated and HRMS established ions ( $m/z$ ) of ZAN biotransformation metabolites.

| Metabolite          | Expected position moiety | Calculated [M-H] <sup>-</sup> | Experimental [M-H] <sup>-</sup> | LC retention time |
|---------------------|--------------------------|-------------------------------|---------------------------------|-------------------|
| Zearalanon          | -                        | 319.1551                      | 319.1555                        | 10.65             |
| Zearalanon-sulfate  | 14 or 16                 | 399.1119                      | 399.1126                        | 9.01              |
| Zearalanon-glucose1 | 14 or 16                 | 481.2079                      | 481.2082                        | 9.01              |
| Zearalanon-glucose2 | 14 or 16                 | 481.2079                      | 481.2084                        | 8.20              |

**Table S8.** Calculated and HRMS established ions ( $m/z$ ) of  $\beta$ -ZEL biotransformation metabolites.

| Metabolite                     | Expected position moiety | Calculated [M-H] <sup>-</sup> | Experimental [M-H] <sup>-</sup> | LC retention time |
|--------------------------------|--------------------------|-------------------------------|---------------------------------|-------------------|
| $\beta$ -zearalenol            | -                        | 319.1551                      | 319.1555                        | 10.06             |
| $\beta$ -zearalenol-sulfate    | 7,14 or 16               | 399.1119                      | 399.1124                        | 8.26              |
| $\beta$ -zearalenol-14-glucose | 14                       | 481.2079                      | 481.2081                        | 8.27              |
| $\beta$ -zearalenol-glucose1   | 7 or 16                  | 481.2079                      | 481.2083                        | 7.51              |
| $\beta$ -zearalenol-glucose2   | 7 or 16                  | 481.2079                      | 481.2084                        | 9.12              |

**Table S9.** LC gradient (LC-MS/MS).

| Time (min) | %A  | %B  |
|------------|-----|-----|
| 0.0        | 100 | 0   |
| 1.0        | 100 | 0   |
| 2.0        | 50  | 50  |
| 3.0        | 50  | 50  |
| 8.00       | 0   | 100 |
| 10.0       | 0   | 100 |
| 10.5       | 100 | 0   |
| 15.0       | 100 | 0   |

**Table S10.** Mycotoxin specific MS/MS settings for the negative ionization mode.

| Q1 ( $m/z$ ) | Q3 ( $m/z$ ) | Rt (min) | Analyte | DP (V) | EP (V) | CE (V) | CXP (V) |
|--------------|--------------|----------|---------|--------|--------|--------|---------|
| 317.1        | 175          | 6.6      | ZEN_1   | -175   | -10    | -32    | -15     |
| 317.1        | 131.1        | 6.6      | ZEN_2   | -175   | -10    | -36    | -11     |
| 478.9        | 317          | 3.9      | Z14G_1  | -105   | -10    | -26    | -27     |
| 478.9        | 273          | 3.9      | Z14G_2  | -105   | -10    | -42    | -19     |
| 479          | 317          | 5        | Z16G_1  | -90    | -10    | -30    | -25     |
| 479          | 273          | 5        | Z16G_2  | -90    | -10    | -44    | -21     |
| 397.2        | 316.9        | 4.5      | Z14S_1  | -55    | -10    | -30    | -21     |
| 397.2        | 175          | 4.5      | Z14S_2  | -55    | -10    | -46    | -11     |

<sup>1</sup> Q1 = Precursor ion, Q3 = Product ions, Rt = LC retention time, DP = Declustering potential, EP = Entrance Potential, CE = Collision Energy and CXP = Collision cell exit potential

**Table S11.** LC gradient (LC-HRMS).

| <b>Time (min)</b> | <b>%A</b> | <b>%B</b> |
|-------------------|-----------|-----------|
| 0.0               | 100       | 0         |
| 10.0              | 0         | 100       |
| 12.0              | 0         | 100       |
| 12.5              | 100       | 0         |
| 16.0              | 100       | 0         |
